# Supplementary material for: High Erk activity suppresses expression of the cell cycle inhibitor p27Kip1 in colorectal cancer cells
Source: PubMed Central journal article supplement (PMC3780716; doi:10.1186/1478-811x-8-1), 2010-02-02
Supplement: 1478-811X-8-1-S4.pdf [file 1478-811X-8-1-S4.pdf]

# HCT 116

untreated

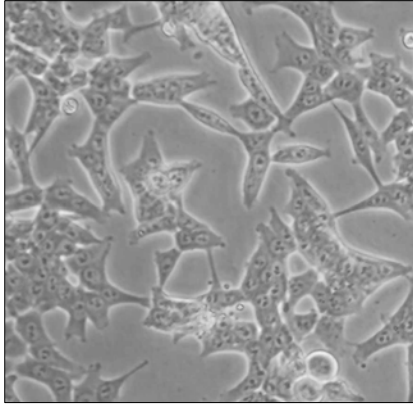

1  $\mu$ M U0126

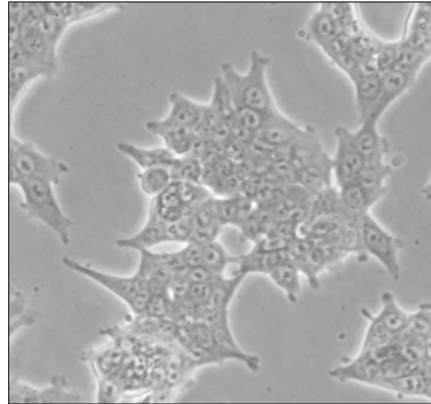

3  $\mu$ M U0126

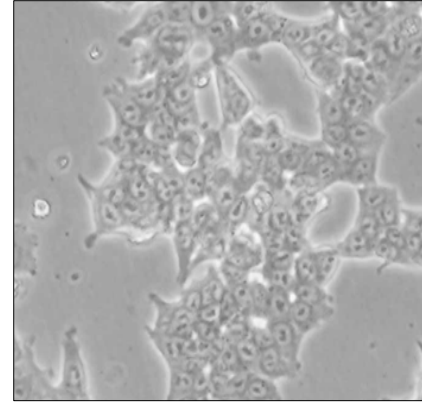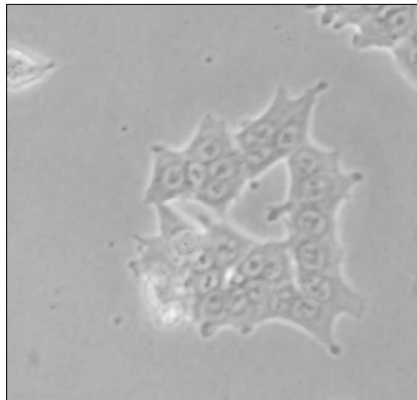

10  $\mu$ M U0126

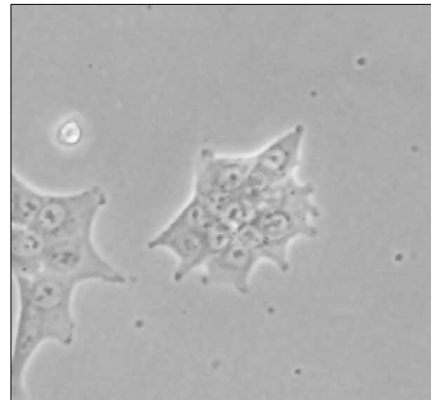

30  $\mu$ M U0126

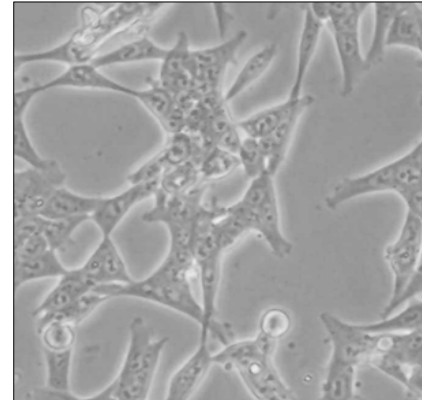

DMSO control

48h treatment
